# Supplementary material
Source: ML conference proceedings conference paper supplement (https://proceedings.neurips.cc/paper_files/paper/2023/hash/5e5fd18f863cbe6d8ae392a93fd271c9-Abstract.html)
Supplement: Supplementary file 1 [file 5e5fd18f863cbe6d8ae392a93fd271c9-Supplemental-Conference.zip]

Archive with 3 entries (3 files):
- llm_tpp_code.zip
- llm_tpp_appendix.pdf
- __MACOSX/._llm_tpp_appendix.pdf
